# Supplementary material
Source: PubMed Central journal article supplement (PMC9059427)
Supplement: NIHMS1684574-supplement-Supplementary_materials.pdf [file NIHMS1684574-supplement-Supplementary_materials.pdf]

# THE LANCET

## Child & Adolescent Health

### Supplementary appendix

This appendix formed part of the original submission and has been peer reviewed.  
We post it as supplied by the authors.

Supplement to: Moke DJ, Luo C, Millstein J, et al. Prevalence and risk factors for cisplatin-induced hearing loss in children, adolescents, and young adults: a multi-institutional North American cohort study. *Lancet Child Adolesc Health* 2021; published online Feb 11. [http://dx.doi.org/10.1016/S2352-4642\(21\)00020-1](http://dx.doi.org/10.1016/S2352-4642(21)00020-1).

## Supplementary Material Table of Context

|            |                                                                                                                                  |    |
|------------|----------------------------------------------------------------------------------------------------------------------------------|----|
| Figure S1: | Patient data included for each endpoint                                                                                          | 2  |
| Table S1:  | International Society of Pediatric Oncology Boston (SIOP) grading scale                                                          | 3  |
| Table S2:  | Multivariable model for risk of hearing aid recommendation at latest follow-up                                                   | 4  |
| Table S3:  | Risk factors for moderate/severe hearing loss at latest follow-up in patients stratified by receipt of cranial radiation therapy | 5  |
| Table S4:  | Risk factors for moderate/severe hearing loss at latest follow-up stratified by underlying CNS malignancy                        | 6  |
| Table S5:  | Multivariable models for documented cisplatin dose reduction and progression-free and overall survival                           | 7  |
| Figure S2: | Progression-free survival by cisplatin dose reduction stratified by underlying diagnosis                                         | 9  |
| Figure S3: | Overall survival by cisplatin dose reduction stratified by underlying diagnosis                                                  | 10 |
| Table S6:  | Multivariable models for cisplatin dosing and progression-free and overall survival                                              | 11 |
| Table S7:  | Multivariable models for moderate/severe hearing loss at end of therapy and progression-free and overall survival                | 13 |

**Figure S1: Patient data included for each endpoint**

Diagram indicating sources of (A) patient data and (B) inclusion for each study endpoint. Cisplatin-treated patients identified from treatment records except in the Vanderbilt cohort where patients were identified through a survivorship clinic. Survival analyses therefore excluded patients from the Vanderbilt cohort to reduce risk of bias favoring survival. Hearing loss endpoints included all patients with audiology assessments passing central review at last follow-up and end of therapy. ABL= Applying Biomarkers to Minimize Long-Term Effects of Childhood/Adolescent Cancer Treatment; CHLA= Children’s Hospital Los Angeles; CPNDS= Canadian Pharmacogenomics Network for Drug Safety; OHSU=Oregon Health & Science University Pediatric Hospital; VB=Vanderbilt Reach for Cancer Survivorship Program.

**A**

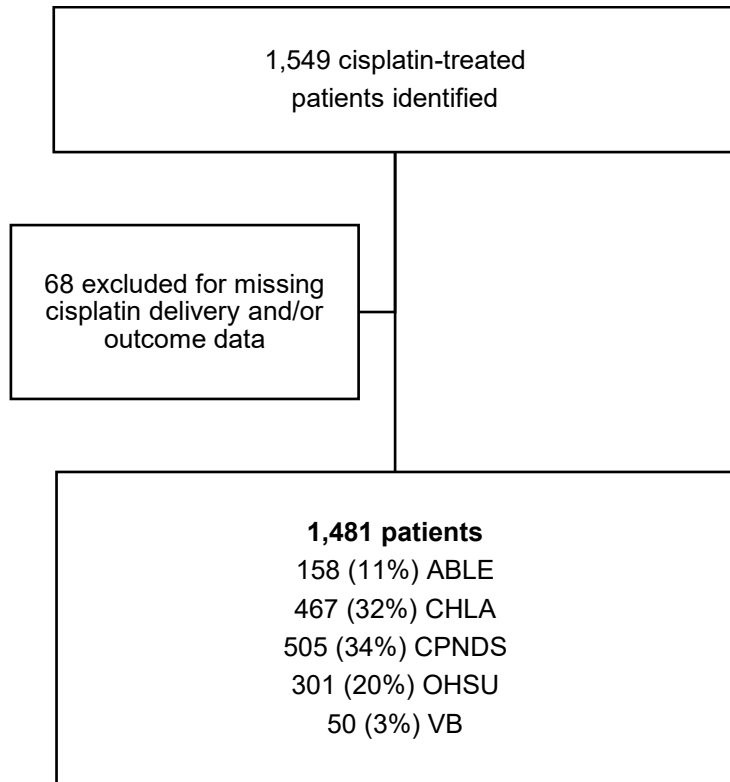

**B**

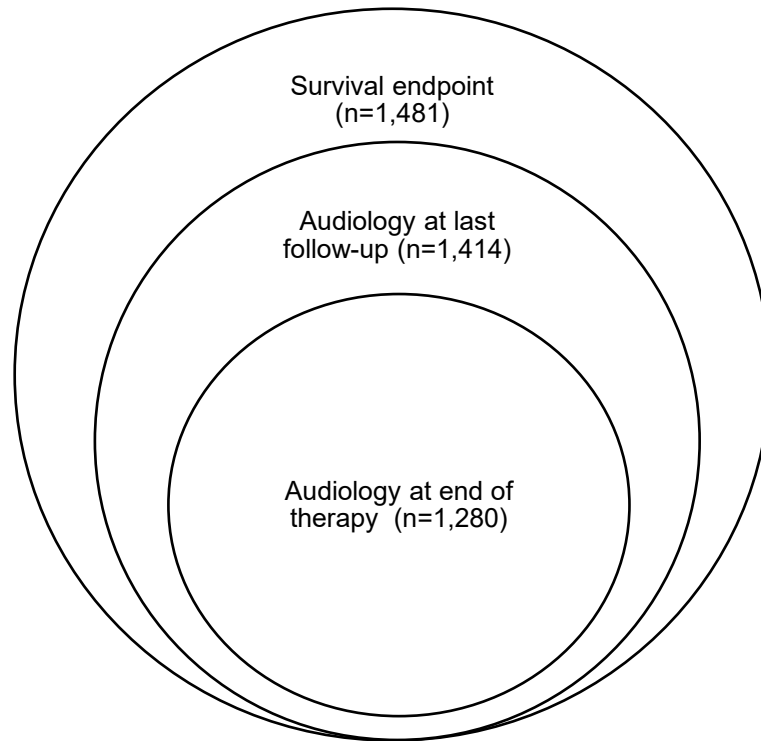

**Table S1: International Society of Pediatric Oncology Boston (SIOP) grading Scale\***

| <b>SIOP Grade</b> | <b>Threshold</b> | <b>Frequencies*</b>                            | <b>Audiology Recommendation</b>                                                               |
|-------------------|------------------|------------------------------------------------|-----------------------------------------------------------------------------------------------|
| 0                 | ≤ 20 dB          | All tested frequencies                         | No intervention                                                                               |
| 1                 | > 20 dB          | At greater than 4000 Hz<br>(6,000 or 8,000 Hz) | FM device, preferential classroom seating, or<br>other communication aid, educational support |
| 2                 | > 20 dB          | At 4000 Hz and above                           | Hearing aid or cochlear implant,<br>educational support                                       |
| 3                 | > 20 dB          | At 2000 Hz or 3000 Hz and above                |                                                                                               |
| 4                 | > 40 dB          | At 2000 Hz and above                           |                                                                                               |

\*Included frequencies 2,000 Hz through 8,000 Hz. dB= decibel; Hz=hertz; *Adapted from Brock et. al., J Clin Oncol; 30(19):2012*

**Table S2: Multivariable model for risk of hearing aid recommendation at latest follow-up**

| Variables                                                     | N    | Multivariable Model <sup>2</sup> |         |
|---------------------------------------------------------------|------|----------------------------------|---------|
|                                                               |      | aOR <sup>1</sup> [95%CI]         | p-value |
| Vincristine exposure                                          |      |                                  |         |
| No                                                            | 557  | Ref                              |         |
| Yes                                                           | 21   | 2.01 [1.10, 3.74]                | 0.025   |
| Unknown                                                       | 680  | 0.97 [0.22, 3.54]                | 0.96    |
| CRT dose, Gy                                                  |      |                                  |         |
| 0                                                             | 931  | Ref                              |         |
| >0 to ≤ 50                                                    | 55   | 1.80 [0.78, 4.04]                | 0.16    |
| >50                                                           | 272  | 1.92 [1.08, 3.45]                | 0.028   |
| VP shunt                                                      |      |                                  |         |
| No                                                            | 627  | Ref                              |         |
| Yes                                                           | 515  | 1.61 [0.97, 2.67]                | 0.067   |
| Unknown                                                       | 116  | 0.65 [0.43, 0.99]                | 0.046   |
| Stem cell transplant                                          |      |                                  |         |
| No                                                            | 991  | Ref                              |         |
| Yes                                                           | 256  | 1.63 [1.03, 2.57]                | 0.037   |
| Unknown                                                       | 11   | 1.60 [0.40, 6.15]                | 0.49    |
| Carboplatin exposure                                          |      |                                  |         |
| No                                                            | 614  | Ref                              |         |
| Yes                                                           | 437  | 1.99 [1.27, 3.10]                | 0.0025  |
| Unknown                                                       | 207  | 0.78 [0.49, 1.22]                | 0.28    |
| Cisplatin dosing parameters                                   |      |                                  |         |
| Cisplatin total cumulative dose, +100 mg/m <sup>2</sup>       | 1258 | 1.05 [0.94, 1.17]                | 0.40    |
| Cisplatin prescribed cycle dose, +50 mg/m <sup>2</sup> /cycle | 1258 | 1.93 [1.30, 2.96]                | 0.0017  |
| Cisplatin prescribed daily dose, +10 mg/m <sup>2</sup> /day   | 1258 | 1.09 [1.00, 1.17]                | 0.040   |

<sup>1</sup>aOR = adjusted Odds Ratio: multivariable logistic regression model includes independent variables as depicted and additionally adjusted for sex, age at diagnosis, race, ethnicity, and underlying malignancy (central nervous system, germ cell tumor, hepatoblastoma or hepatocellular carcinoma, neuroblastoma, osteosarcoma, other). Cisplatin dosing parameters were evaluated in a series of nested logistic regression models including progressively more granular dosing (Model 2: +cumulative dose; Model 3: +cumulative dose, cycle dose; Model 4: +cumulative dose, cycle dose, daily dose; Model 5: +cumulative dose, cycle dose, daily dose, dose rate); Likelihood Ratio Tests compared each model (Base Model vs. Model 2, p= 0.56; Models 2 vs. 3, p= 0.0010; Models 3 vs. 4, p= 0.043; Models 4 vs. 5, p= 0.46). Dosing rate was not significant; Model 4 reported.

**Table S3: Risk factors for moderate/severe hearing loss at latest follow-up in patients stratified by receipt of cranial radiation therapy**

| Variables                                                     | With cranial radiotherapy |                    |         |                                  |         | Without cranial radiotherapy |                   |         |                                  |         |
|---------------------------------------------------------------|---------------------------|--------------------|---------|----------------------------------|---------|------------------------------|-------------------|---------|----------------------------------|---------|
|                                                               | N                         | Univariable model  |         | Multivariable model <sup>2</sup> |         | N                            | Univariable model |         | Multivariable model <sup>2</sup> |         |
|                                                               |                           | OR [95%CI]         | p-value | aOR <sup>1</sup> [95%CI]         | p-value |                              | OR [95%CI]        | p-value | aOR <sup>1</sup> [95%CI]         | p-value |
| Stem cell transplant                                          |                           |                    |         |                                  |         |                              |                   |         |                                  |         |
| No                                                            | 243                       | Ref                |         | Ref                              |         | 639                          | Ref               |         | Ref                              |         |
| Yes                                                           | 60                        | 1.83 [1.03, 3.32]  | 0.042   | 1.15 [0.52, 2.54]                | 0.73    | 186                          | 3.17 [2.26, 4.50] | <0.0001 | 0.79 [0.42, 1.46]                | 0.45    |
| Unknown                                                       | 35                        | 0.71 [0.34, 1.44]  | 0.34    | 2.77 [0.83, 9.67]                | 0.10    | 98                           | 1.19 [0.77, 1.83] | 0.43    | 1.91 [0.84, 4.35]                | 0.12    |
| Carboplatin exposure                                          |                           |                    |         |                                  |         |                              |                   |         |                                  |         |
| No                                                            | 163                       | Ref                |         | Ref                              |         | 403                          | Ref               |         | Ref                              |         |
| Yes                                                           | 44                        | 1.69 [0.85, 3.46]  | 0.14    | 1.47 [0.61, 3.73]                | 0.40    | 155                          | 4.68 [3.14, 7.09] | <0.0001 | 2.81 [1.57, 5.08]                | 0.00054 |
| Unknown                                                       | 131                       | 0.61 [0.38, 0.97]  | 0.039   | 0.40 [0.17, 0.91]                | 0.033   | 365                          | 1.36 [1.02, 1.82] | 0.039   | 1.11 [0.62, 1.97]                | 0.73    |
| Vincristine exposure                                          |                           |                    |         |                                  |         |                              |                   |         |                                  |         |
| No                                                            | 46                        | Ref                |         | Ref                              |         | 520                          | Ref               |         | Ref                              |         |
| Yes                                                           | 289                       | 4.34 [2.15, 9.55]  | <0.0004 | 4.58 [1.43, 16.63]               | 0.014   | 390                          | 5.77 [4.34, 7.71] | <0.0001 | 3.36 [1.86, 6.17]                | <0.0001 |
| Unknown                                                       | 3                         | 7.2 [0.63, 164.65] | 0.12    | 5.77 [0.32, 188.37]              | 0.25    | 13                           | 2.3 [0.73, 7.05]  | 0.14    | 2.85 [0.71, 11.66]               | 0.14    |
| VP shunt                                                      |                           |                    |         |                                  |         |                              |                   |         |                                  |         |
| No                                                            | 116                       | Ref                |         | Ref                              |         | 401                          | Ref               |         | Ref                              |         |
| Yes                                                           | 72                        | 2.31 [1.27, 4.25]  | 0.0065  | 2.30 [1.16, 4.66]                | 0.018   | 32                           | 3.05 [1.44, 6.89] | 0.0047  | 1.28 [0.45, 3.77]                | 0.65    |
| Unknown                                                       | 150                       | 1.63 [1.00, 2.68]  | 0.050   | 2.14 [0.98, 4.75]                | 0.058   | 490                          | 1.16 [0.89, 1.51] | 0.28    | 1.07 [0.63, 1.81]                | 0.80    |
| Time from diagnosis to audiogram, years                       | 338                       | 1.16 [1.08, 1.24]  | <0.0001 | 1.18 [1.08, 1.30]                | 0.00025 | 923                          | 1.09 [1.05, 1.12] | <0.0001 | 1.11 [1.06, 1.16]                | <0.0001 |
| Cisplatin dosing parameters                                   |                           |                    |         |                                  |         |                              |                   |         |                                  |         |
| Cisplatin total cumulative dose, +100 mg/m <sup>2</sup>       | 338                       | 0.96 [0.80, 1.14]  | 0.62    | 0.92 [0.73, 1.17]                | 0.51    | 923                          | 1.13 [1.03, 1.23] | 0.0075  | 1.28 [1.14, 1.44]                | <0.0001 |
| Cisplatin prescribed cycle dose, +50 mg/m <sup>2</sup> /cycle | 338                       | 1.99 [1.08, 3.90]  | 0.035   | 0.86 [0.27, 2.53]                | 0.79    | 923                          | 1.64 [1.40, 1.94] | <0.0001 | 2.88 [1.58, 5.49]                | 0.00086 |
| Cisplatin prescribed daily dose, +10 mg/m <sup>2</sup> /day   | 338                       | 1.31 [1.15, 1.50]  | <0.0001 | 1.36 [1.12, 1.70]                | 0.0029  | 923                          | 1.17 [1.12, 1.22] | <0.0001 | 1.20 [1.08, 1.35]                | 0.0011  |
| Cisplatin dose rate, +1 mg/m <sup>2</sup> /hour               | 338                       | 1.03 [1.00, 1.08]  | 0.14    | 1.03 [0.98, 1.11]                | 0.30    | 923                          | 1.02 [1.01, 1.03] | <0.0001 | 0.96 [0.93, 0.99]                | 0.019   |

<sup>1</sup>aOR = adjusted Odds Ratio: multivariable logistic regression models include independent variables as depicted and additionally adjusted for sex, age at diagnosis, race, ethnicity, and underlying malignancy (central nervous system, germ cell tumor, hepatoblastoma or hepatocellular carcinoma, neuroblastoma, osteosarcoma, other). <sup>2</sup>Cisplatin dosing parameters were evaluated in a series of nested logistic regression models including progressively more granular dosing (Model 2: +cumulative dose; Model 3: +cumulative dose, cycle dose; Model 4: +cumulative dose, cycle dose, daily dose; Model 5: +cumulative dose, cycle dose, daily dose, dose rate). Likelihood Ratio Tests compared models in patient receiving cranial radiotherapy (Base Model vs. Model 2, p= 0.36; Models 2 vs. 3, p= 0.55; Models 3 vs. 4, p= 0.0020; Models 4 vs. 5, p= 0.25) and in those without (Base Model vs. Model 2, p<0.0001; Models 2 vs. 3, p= 0.0081; Models 3 vs. 4, p= 0.018; Models 4 vs. 5, p= 0.013). Model 5 reported for both groups.

**Table S4: Risk factors for moderate/severe hearing loss at latest follow-up stratified by underlying CNS malignancy**

| Variables                                                     | CNS malignancy |                    |         |                                  |         | Without CNS malignancy |                   |         |                                  |         |
|---------------------------------------------------------------|----------------|--------------------|---------|----------------------------------|---------|------------------------|-------------------|---------|----------------------------------|---------|
|                                                               | N              | Univariable model  |         | Multivariable model <sup>2</sup> |         | N                      | Univariable model |         | Multivariable model <sup>2</sup> |         |
|                                                               |                | OR [95%CI]         | p-value | aOR <sup>1</sup> [95%CI]         | p-value |                        | OR [95%CI]        | p-value | aOR <sup>1</sup> [95%CI]         | p-value |
| Stem cell transplant                                          |                |                    |         |                                  |         |                        |                   |         |                                  |         |
| No                                                            | 243            | Ref                |         | Ref                              |         | 639                    | Ref               |         | Ref                              |         |
| Yes                                                           | 103            | 1.77 [1.11, 2.86]  | 0.018   | 1.18 [0.57, 2.42]                | 0.64    | 143                    | 3.33 [2.28, 4.92] | <0.0001 | 0.88 [0.45, 1.68]                | 0.70    |
| Unknown                                                       | 49             | 0.68 [0.36, 1.27]  | 0.23    | 1.75 [0.56, 5.55]                | 0.34    | 84                     | 1.22 [0.77, 1.93] | 0.39    | 2.08 [0.90, 4.81]                | 0.086   |
| Carboplatin exposure                                          |                |                    |         |                                  |         |                        |                   |         |                                  |         |
| No                                                            | 156            | Ref                |         | Ref                              |         | 410                    | Ref               |         | Ref                              |         |
| Yes                                                           | 65             | 1.57 [0.87, 2.88]  | 0.14    | 1.28 [0.59, 2.84]                | 0.54    | 134                    | 5.06 [3.30, 7.90] | <0.0001 | 2.98 [1.63, 5.55]                | 0.00046 |
| Unknown                                                       | 174            | 0.76 [0.49, 1.18]  | 0.22    | 0.55 [0.25, 1.19]                | 0.13    | 322                    | 1.20 [0.89, 1.62] | 0.24    | 0.89 [0.49, 1.60]                | 0.69    |
| Vincristine exposure                                          |                |                    |         |                                  |         |                        |                   |         |                                  |         |
| No                                                            | 41             | Ref                |         | Ref                              |         | 525                    | Ref               |         | Ref                              |         |
| Yes                                                           | 347            | 4.56 [2.20, 10.42] | 0.00011 | 2.75 [1.00, 8.04]                | 0.055   | 332                    | 6.00 [4.45, 8.14] | <0.0001 | 2.83 [1.78, 4.53]                | <0.0001 |
| Unknown                                                       | 7              | 4.74 [0.89, 28.07] | 0.068   | 2.52 [0.35, 19.62]               | 0.36    | 9                      | 2.16 [0.53, 8.26] | 0.26    | 1.47 [0.31, 6.90]                | 0.61    |
| CRT dose, Gy                                                  |                |                    |         |                                  |         |                        |                   |         |                                  |         |
| 0                                                             | 82             | Ref                |         | Ref                              |         | 841                    | Ref               |         | Ref                              |         |
| >0 to ≤ 50                                                    | 41             | 0.41 [0.19, 0.88]  | 0.023   | 0.55 [0.19, 1.65]                | 0.29    | 12                     | 2.63 [0.82, 9.93] | 0.12    | 2.46 [0.52, 12.31]               | 0.26    |
| >50                                                           | 272            | 0.70 [0.42, 1.15]  | 0.16    | 0.83 [0.41, 1.69]                | 0.61    | 13                     | 0.59 [0.16, 1.81] | 0.38    | 1.04 [0.23, 3.77]                | 0.96    |
| VP shunt                                                      |                |                    |         |                                  |         |                        |                   |         |                                  |         |
| No                                                            | 127            | Ref                |         | Ref                              |         | 390                    | Ref               |         | Ref                              |         |
| Yes                                                           | 103            | 2.49 [1.47, 4.28]  | 0.00083 | 2.40 [1.31, 4.44]                | 0.0048  | 1                      | -                 | -       | -                                | -       |
| Unknown                                                       | 165            | 1.64 [1.03, 2.62]  | 0.039   | 2.63 [1.24, 5.71]                | 0.013   | 475                    | 1.14 [0.87, 1.50] | 0.33    | 0.89 [0.52, 1.50]                | 0.65    |
| Time from diagnosis to audiogram, years                       | 395            | 1.16 [1.09, 1.24]  | <0.0001 | 1.20 [1.11, 1.31]                | <0.0001 | 866                    | 1.08 [1.05, 1.12] | <0.0001 | 1.08 [1.04, 1.13]                | 0.00037 |
| Cisplatin dosing parameters                                   |                |                    |         |                                  |         |                        |                   |         |                                  |         |
| Cisplatin total cumulative dose, +100 mg/m <sup>2</sup>       | 395            | 0.96 [0.80, 1.14]  | 0.62    | 0.91 [0.73, 1.12]                | 0.37    | 866                    | 1.17 [1.07, 1.29] | 0.0004  | 1.30 [1.15, 1.46]                | <0.0001 |
| Cisplatin prescribed cycle dose, +50 mg/m <sup>2</sup> /cycle | 395            | 2.57 [1.34, 5.03]  | 0.0052  | 0.60 [0.14, 1.88]                | 0.41    | 866                    | 1.77 [1.50, 2.09] | <0.0001 | 2.71 [1.74, 4.32]                | <0.0001 |
| Cisplatin prescribed daily dose, +10 mg/m <sup>2</sup> /day   | 395            | 1.38 [1.22, 1.56]  | <0.0001 | 1.42 [1.16, 1.85]                | 0.0021  | 866                    | 1.15 [1.10, 1.21] | <0.0001 | 1.20 [1.12, 1.29]                | <0.0001 |
| Cisplatin dose rate, +1 mg/m <sup>2</sup> /hour               | 395            | 1.02 [0.98, 1.08]  | 0.34    | 1.01 [0.96, 1.08]                | 0.67    | 866                    | 1.03 [1.02, 1.04] | <0.0001 | 0.97 [0.95, 0.99]                | 0.0019  |

<sup>1</sup> aOR = adjusted Odds Ratio: multivariable logistic regression models include independent variables as depicted and additionally adjusted for sex, age at diagnosis, race, ethnicity, and underlying malignancy (central nervous system, germ cell tumor, hepatoblastoma or hepatocellular carcinoma, neuroblastoma, osteosarcoma, other). <sup>2</sup> Cisplatin dosing parameters were evaluated in a series of nested logistic regression models including progressively more granular dosing (Model 2: +cumulative dose; Model 3: +cumulative dose, cycle dose; Model 4: +cumulative dose, cycle dose, daily dose; Model 5: +cumulative dose, cycle dose, daily dose, dose rate). Likelihood Ratio Tests compared models in patients with CNS tumors (Base Model vs. Model 2, p= 0.25; Models 2 vs. 3, p= 0.53; Models 3 vs. 4, p= 0.00058; Models 4 vs. 5, p= 0.66) and in those without (Base Model vs. Model 2, p<0.0001; Models 2 vs. 3, p= 0.014; Models 3 vs. 4, p<0.0001; Models 4 vs. 5, p= 0.0013). Model 5 reported for both groups. CNS = central nervous system tumor; CRT = cranial radiotherapy; VP shunt – ventriculoperitoneal (or other ventricular) shunt.

**Table S5: Multivariable models for documented cisplatin dose reduction and progression-free and overall survival**

| Variables                          | Progression Free Survival |                       |         |                                      |         | Overall Survival |                       |         |                                      |         |
|------------------------------------|---------------------------|-----------------------|---------|--------------------------------------|---------|------------------|-----------------------|---------|--------------------------------------|---------|
|                                    | N                         | Univariable Cox model |         | Multivariable Cox model <sup>1</sup> |         | N                | Univariable Cox model |         | Multivariable Cox model <sup>1</sup> |         |
|                                    |                           | HR [95%CI]            | p-value | HR [95%CI]                           | p-value |                  | HR [95%CI]            | p-value | HR [95%CI]                           | p-value |
| Sex                                |                           |                       |         |                                      |         |                  |                       |         |                                      |         |
| Female                             | 300                       | Ref                   |         | Ref                                  |         | 301              | Ref                   |         | Ref                                  |         |
| Male                               | 455                       | 1.09 [0.85, 1.42]     | 0.49    | 1.08 [0.83, 1.41]                    | 0.57    | 456              | 1.27 [0.94, 1.71]     | 0.12    | 1.23 [0.90, 1.68]                    | 0.19    |
| Age at diagnosis, years            |                           |                       |         |                                      |         |                  |                       |         |                                      |         |
| <5                                 | 305                       | Ref                   |         | Ref                                  |         | 305              | Ref                   |         | Ref                                  |         |
| 5 to <15                           | 302                       | 0.87 [0.66, 1.15]     | 0.33    | 0.98 [0.68, 1.42]                    | 0.91    | 303              | 0.86 [0.63, 1.17]     | 0.35    | 1.07 [0.71, 1.61]                    | 0.75    |
| ≥15                                | 148                       | 0.73 [0.51, 1.06]     | 0.10    | 0.98 [0.60, 1.61]                    | 0.94    | 149              | 0.69 [0.44, 1.06]     | 0.089   | 1.01 [0.57, 1.78]                    | 0.98    |
| Ethnicity                          |                           |                       |         |                                      |         |                  |                       |         |                                      |         |
| Non-Hispanic                       | 446                       | Ref                   |         |                                      |         | 448              | Ref                   |         |                                      |         |
| Hispanic                           | 293                       | 1.11 [0.86, 1.43]     | 0.43    | 0.97 [0.68, 1.39]                    | 0.88    | 293              | 0.89 [0.66, 1.20]     | 0.45    | 0.90 [0.58, 1.38]                    | 0.62    |
| Unknown                            | 16                        | 0.52 [0.13, 2.11]     | 0.36    | 0.73 [0.16, 3.29]                    | 0.68    | 16               |                       |         |                                      |         |
| Race                               |                           |                       |         |                                      |         |                  |                       |         |                                      |         |
| White                              | 478                       | Ref                   |         | Ref                                  |         | 480              | Ref                   |         | Ref                                  |         |
| Black                              | 26                        | 1.44 [0.76, 2.74]     | 0.26    | 1.52 [0.75, 3.08]                    | 0.25    | 26               | 1.58 [0.80, 3.11]     | 0.18    | 2.00 [0.91, 4.39]                    | 0.084   |
| Asian                              | 60                        | 1.30 [0.81, 2.07]     | 0.28    | 1.45 [0.85, 2.48]                    | 0.17    | 60               | 0.78 [0.41, 1.48]     | 0.45    | 1.25 [0.62, 2.52]                    | 0.53    |
| Other/unknown                      | 191                       | 1.21 [0.90, 1.62]     | 0.20    | 1.74 [1.17, 2.60]                    | 0.0067  | 191              | 1.17 [0.84, 1.62]     | 0.36    | 3.10 [1.91, 5.04]                    | <0.0001 |
| Diagnosis                          |                           |                       |         |                                      |         |                  |                       |         |                                      |         |
| CNS                                | 262                       | Ref                   |         |                                      |         | 263              | Ref                   |         |                                      |         |
| Non-CNS                            | 493                       | 0.81 [0.63, 1.05]     | 0.11    |                                      |         | 494              | 0.71 [0.54, 0.95]     | 0.022   |                                      |         |
| Underlying malignancy <sup>2</sup> |                           |                       |         |                                      |         |                  |                       |         |                                      |         |
| CNS                                | 262                       | Ref                   |         |                                      |         | 263              | Ref                   |         |                                      |         |
| Germ cell tumor                    | 98                        | 0.28 [0.14, 0.53]     | 0.00011 |                                      |         | 98               | 0.07 [0.02, 0.28]     | 0.00017 |                                      |         |
| Hepatic tumor (HB or HCC)          | 80                        | 0.59 [0.35, 0.98]     | 0.042   |                                      |         | 80               | 0.34 [0.16, 0.70]     | 0.0035  |                                      |         |
| Neuroblastoma                      | 110                       | 1.35 [0.97, 1.90]     | 0.080   |                                      |         | 110              | 1.39 [0.97, 2.01]     | 0.076   |                                      |         |
| Osteosarcoma                       | 154                       | 0.94 [0.67, 1.31]     | 0.71    |                                      |         | 155              | 0.89 [0.61, 1.29]     | 0.55    |                                      |         |
| Other                              | 51                        | 0.73 [0.42, 1.28]     | 0.27    |                                      |         | 51               | 0.61 [0.32, 1.18]     | 0.14    |                                      |         |
| Stem cell transplant <sup>3</sup>  |                           |                       |         |                                      |         |                  |                       |         |                                      |         |
| No                                 | 576                       | Ref                   |         | Ref                                  |         | 578              | Ref                   |         | Ref                                  |         |
| Yes                                | 179                       | 1.65 [1.27, 2.16]     | 0.00022 | 0.78 [0.49, 1.24]                    | 0.29    | 179              | 1.49 [1.10, 2.02]     | 0.011   | 0.48 [0.29, 0.78]                    | 0.0035  |
| Carboplatin exposure <sup>3</sup>  |                           |                       |         |                                      |         |                  |                       |         |                                      |         |
| No                                 | 222                       | Ref                   |         | Ref                                  |         | 223              | Ref                   |         | Ref                                  |         |
| Yes                                | 79                        | 2.31 [1.56, 3.42]     | <0.0001 | 2.11 [1.27, 3.50]                    | 0.0038  | 80               | 2.06 [1.38, 3.07]     | 0.00041 | 1.71 [1.01, 2.93]                    | 0.048   |
| Unknown                            | 454                       | 1.49 [1.10, 2.01]     | 0.010   | 1.32 [0.87, 1.99]                    | 0.19    | 454              | 0.88 [0.63, 1.22]     | 0.44    | 0.57 [0.35, 0.94]                    | 0.027   |
| Vincristine exposure <sup>3</sup>  |                           |                       |         |                                      |         |                  |                       |         |                                      |         |
| No                                 | 285                       | Ref                   |         | Ref                                  |         | 286              | Ref                   |         | Ref                                  |         |
| Yes                                | 449                       | 1.27 [0.96, 1.67]     | 0.088   | 0.61 [0.30, 1.23]                    | 0.17    | 450              | 1.57 [1.14, 2.18]     | 0.0061  | 0.88 [0.36, 2.16]                    | 0.78    |
| Unknown                            | 21                        | 3.63 [2.05, 6.43]     | <0.0001 | 1.91 [0.83, 4.40]                    | 0.13    | 21               | 2.69 [1.28, 5.67]     | 0.0093  | 1.98 [0.67, 5.82]                    | 0.22    |
| CRT dose, Gy <sup>3</sup>          |                           |                       |         |                                      |         |                  |                       |         |                                      |         |
| 0                                  | 542                       | Ref                   |         | Ref                                  |         | 543              | Ref                   |         | Ref                                  |         |
| >0 to ≤ 50                         | 12                        | 1.11 [0.45, 2.70]     | 0.82    | 0.99 [0.36, 2.72]                    | 0.98    | 13               | 1.56 [0.69, 3.55]     | 0.29    | 0.86 [0.33, 2.28]                    | 0.77    |
| >50                                | 201                       | 1.03 [0.78, 1.36]     | 0.84    | 0.95 [0.57, 1.60]                    | 0.86    | 201              | 1.08 [0.79, 1.48]     | 0.63    | 0.63 [0.35, 1.14]                    | 0.13    |



|                                                               |     |                   |         |                   |       |     |                    |         |                   |        |
|---------------------------------------------------------------|-----|-------------------|---------|-------------------|-------|-----|--------------------|---------|-------------------|--------|
| VP Shunt                                                      |     |                   |         |                   |       |     |                    |         |                   |        |
| No                                                            | 636 | Ref               |         | Ref               |       | 638 | Ref                |         | Ref               |        |
| Yes                                                           | 115 | 1.53 [1.13, 2.08] | 0.0066  | 1.48 [0.98, 2.22] | 0.062 | 115 | 1.48 [1.04, 2.09]  | 0.028   | 1.33 [0.85, 2.06] | 0.21   |
| Unknown                                                       | 4   | 0.61 [0.09, 4.37] | 0.62    | 0.69 [0.08, 5.83] | 0.74  | 4   |                    |         |                   |        |
| Cisplatin dosing parameters                                   |     |                   |         |                   |       |     |                    |         |                   |        |
| Cisplatin total cumulative dose, +100 mg/m <sup>2</sup>       | 755 | 0.87 [0.79, 0.97] | 0.011   | 0.92 [0.80, 1.05] | 0.21  | 757 | 0.80 [0.71, 0.90]  | 0.00028 | 0.82 [0.70, 0.96] | 0.013  |
| Cisplatin prescribed cycle dose, +50 mg/m <sup>2</sup> /cycle | 755 | 1.32 [1.14, 1.52] | 0.00019 | 1.95 [1.15, 3.30] | 0.013 | 757 | 1.40 [1.19, 1.64]  | <0.0001 | 2.75 [1.50, 5.04] | 0.0011 |
| Cisplatin prescribed daily dose, +10 mg/m <sup>2</sup> /day   | 755 | 1.02 [0.98, 1.07] | 0.34    | 0.93 [0.86, 1.01] | 0.095 | 757 | 1.04 [0.99, 1.09]  | 0.12    | 0.98 [0.89, 1.08] | 0.68   |
| Cisplatin dose rate, +1 mg/m <sup>2</sup> /hour               | 755 | 1.01 [1.00, 1.02] | 0.019   | 0.99 [0.97, 1.01] | 0.22  | 757 | 1.01 [1.001, 1.02] | 0.031   | 0.98 [0.96, 1.01] | 0.056  |
| Cisplatin dose reduction                                      |     |                   |         |                   |       |     |                    |         |                   |        |
| No                                                            | 570 | Ref               |         | Ref               |       | 571 | Ref                |         | Ref               |        |
| Yes                                                           | 185 | 0.95 [0.71, 1.27] | 0.73    | 0.86 [0.61, 1.21] | 0.38  | 186 | 1.03 [0.74, 1.42]  | 0.87    | 0.83 [0.56, 1.23] | 0.36   |

<sup>1</sup>Cisplatin dosing parameters were evaluated in a series of nested cox regression models including progressively more granular dosing (Model 2: +cumulative dose; Model 3: +cumulative dose, cycle dose; Model 4: +cumulative dose, cycle dose, daily dose; Model 5: +cumulative dose, cycle dose, daily dose, dose rate; Model 6: +cumulative dose, cycle dose, daily dose, dose rate, cisplatin dose reduction); Likelihood Ratio Tests compared each model for progression-free survival (Base Model vs. Model 2, p= 0.45; Models 2 vs. 3, p= 0.026; Models 3 vs. 4, p= 0.043; Models 4 vs. 5, p= 0.20; Models 5 vs. 6, p= 0.38) and overall survival (Base Model vs. Model 2, p= 0.041; Models 2 vs. 3, p= 0.0025; Models 3 vs. 4, p= 0.37; Models 4 vs. 5, p= 0.051; Models 5 vs. 6, p= 0.35). Model 6 showing variable of interest reported. <sup>2</sup>Underlying malignancy was modeled as a strata factor in multivariable cox models. <sup>3</sup>Treatment variables included to additionally account for regimen differences potentially affecting survival within diagnosis strata. CNS = central nervous system tumor; HB or HCC = hepatoblastoma or hepatocellular carcinoma; CRT = cranial radiotherapy; VP shunt – ventriculoperitoneal (or other ventricular) shunt.

Figure S2: Progression-free survival by cisplatin dose reduction stratified by underlying diagnosis

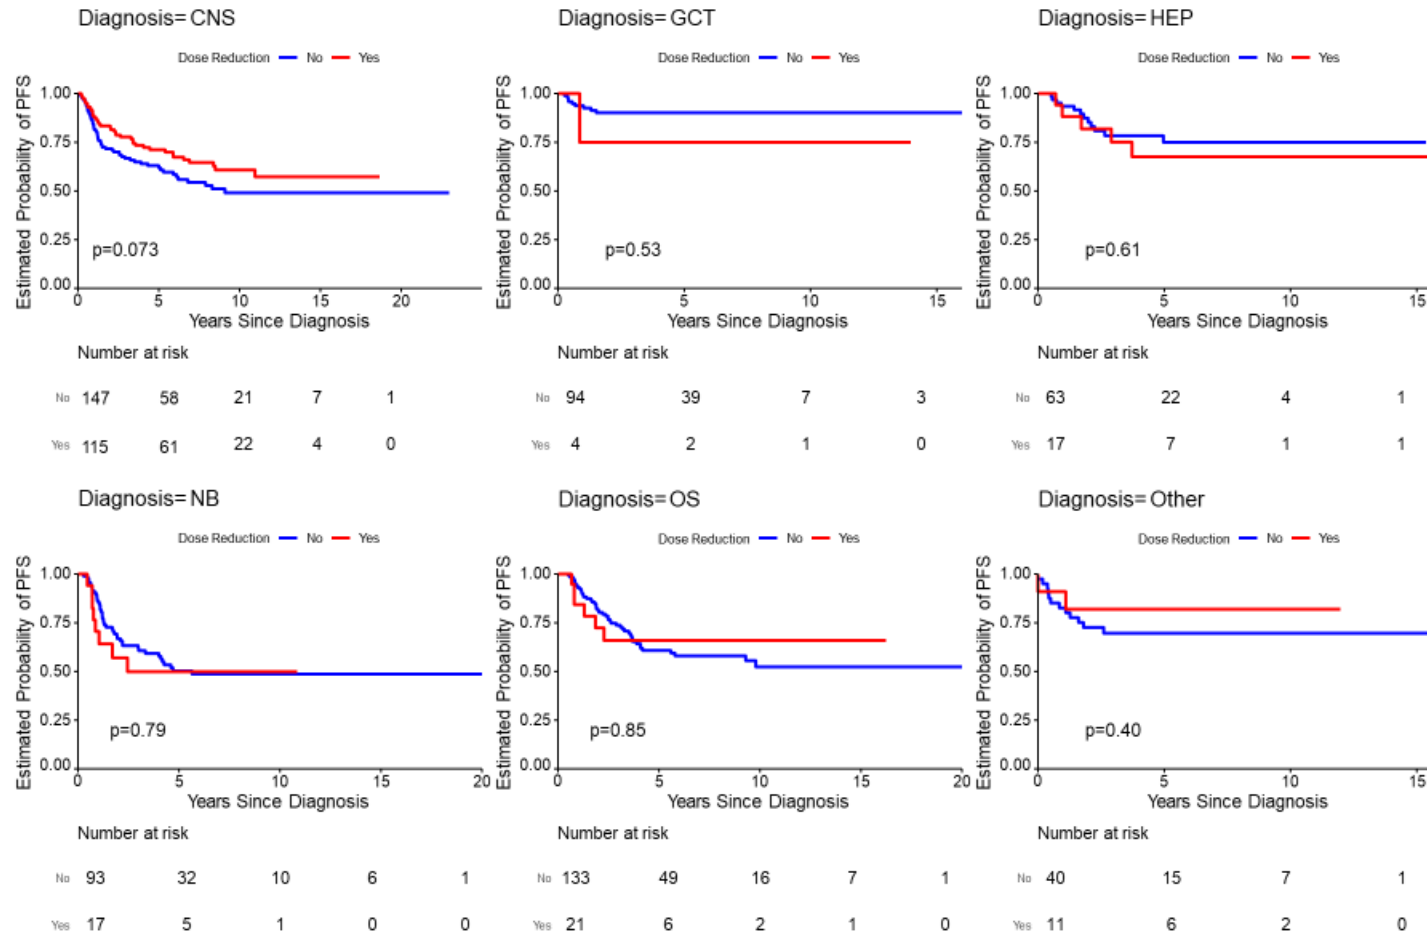

CNS=central nervous system tumor; GCT=germ cell tumor; HEP=hepatoblastoma or hepatocellular carcinoma; NB=neuroblastoma; OS=osteosarcoma.

Figure S3: Overall survival by cisplatin dose reduction stratified by underlying diagnosis

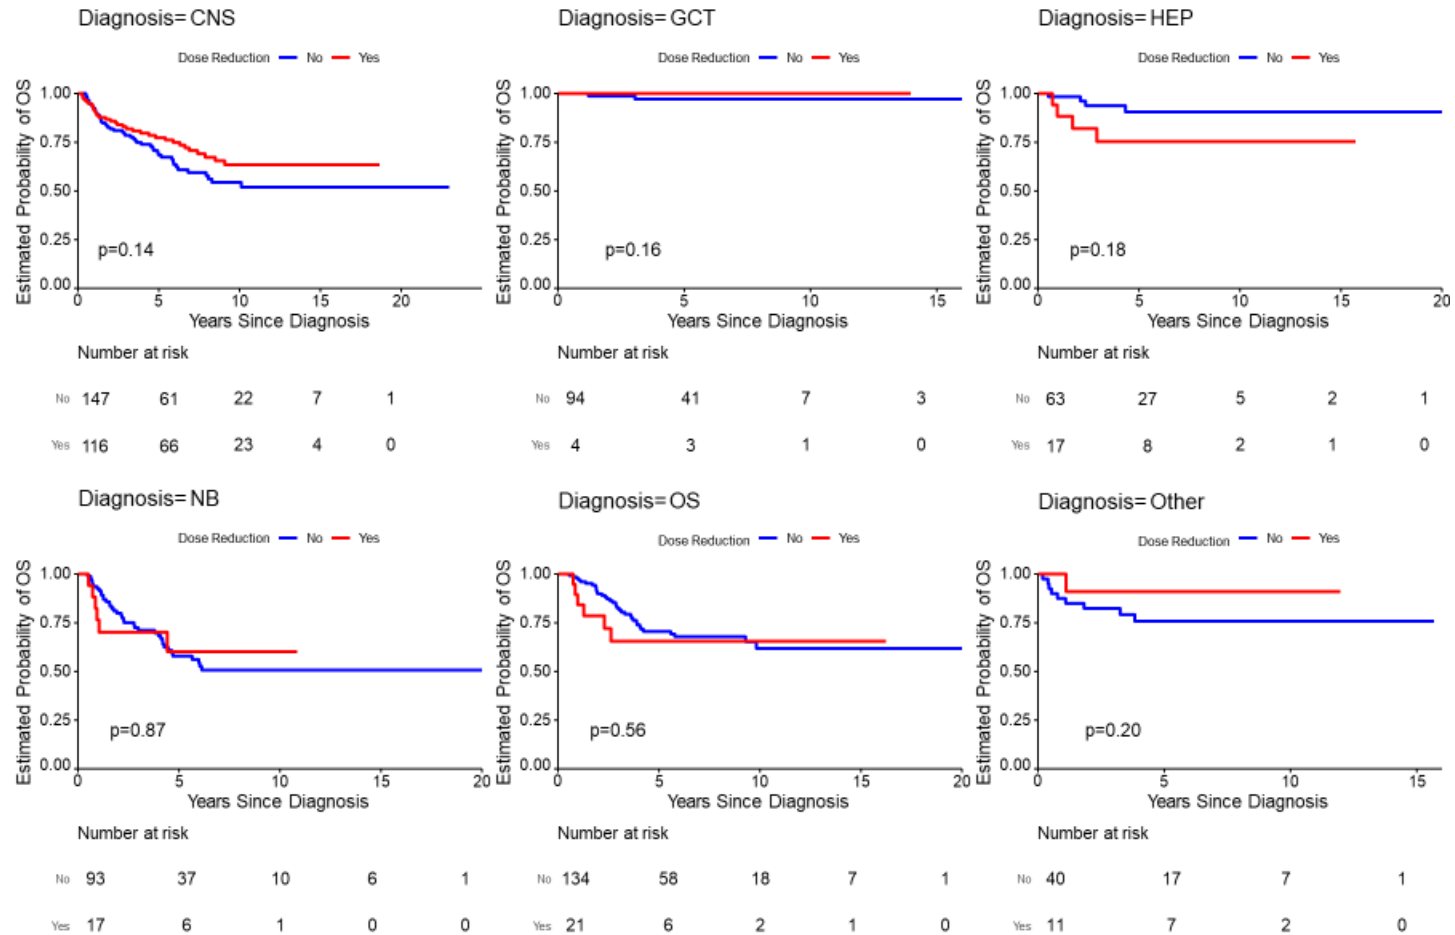

CNS=central nervous system tumor; GCT=germ cell tumor; HEP=hepatoblastoma or hepatocellular carcinoma; NB=neuroblastoma; OS=osteosarcoma.

**Table S6: Multivariable models for cisplatin dosing and progression-free and overall survival**

| Variables                          | Progression Free Survival |                       |         |                                      |         | Overall Survival |                       |         |                                      |         |
|------------------------------------|---------------------------|-----------------------|---------|--------------------------------------|---------|------------------|-----------------------|---------|--------------------------------------|---------|
|                                    | N                         | Univariable Cox model |         | Multivariable Cox model <sup>1</sup> |         | N                | Univariable Cox model |         | Multivariable Cox model <sup>1</sup> |         |
|                                    |                           | HR [95%CI]            | p-value | HR [95%CI]                           | p-value |                  | HR [95%CI]            | p-value | HR [95%CI]                           | p-value |
| Sex                                |                           |                       |         |                                      |         |                  |                       |         |                                      |         |
| Female                             | 544                       | Ref                   |         | Ref                                  |         | 632              | Ref                   |         | Ref                                  |         |
| Male                               | 725                       | 1.19 [0.94, 1.49]     | 0.14    | 1.08 [0.86, 1.37]                    | 0.50    | 804              | 1.30 [0.99, 1.71]     | 0.057   | 1.22 [0.92, 1.62]                    | 0.16    |
| Age at diagnosis, years            |                           |                       |         |                                      |         |                  |                       |         |                                      |         |
| <5                                 | 526                       | Ref                   |         | Ref                                  |         | 611              | Ref                   |         | Ref                                  |         |
| 5 to <15                           | 556                       | 1.07 [0.84, 1.36]     | 0.60    | 1.20 [0.87, 1.66]                    | 0.26    | 622              | 1.01 [0.76, 1.34]     | 0.93    | 1.07 [0.73, 1.55]                    | 0.74    |
| ≥15                                | 187                       | 1.24 [0.89, 1.75]     | 0.21    | 1.36 [0.87, 2.11]                    | 0.18    | 203              | 1.07 [0.7, 1.63]      | 0.76    | 0.99 [0.58, 1.7]                     | 0.97    |
| Ethnicity                          |                           |                       |         |                                      |         |                  |                       |         |                                      |         |
| Non-Hispanic                       | 742                       | Ref                   |         | Ref                                  |         | 894              | Ref                   |         | Ref                                  |         |
| Hispanic                           | 366                       | 1.27 [0.99, 1.62]     | 0.061   | 0.89 [0.63, 1.26]                    | 0.52    | 372              | 1.3 [0.97, 1.73]      | 0.078   | 0.79 [0.53, 1.19]                    | 0.26    |
| Unknown                            | 161                       | 0.5 [0.32, 0.79]      | 0.0026  | 0.75 [0.41, 1.37]                    | 0.36    | 170              | 0.26 [0.13, 0.52]     | 0.00018 | 0.33 [0.13, 0.8]                     | 0.014   |
| Race                               |                           |                       |         |                                      |         |                  |                       |         |                                      |         |
| White                              | 715                       | Ref                   |         | Ref                                  |         | 834              | Ref                   |         | Ref                                  |         |
| Black                              | 29                        | 1.6 [0.85, 3.03]      | 0.15    | 1.41 [0.71, 2.78]                    | 0.33    | 35               | 1.88 [0.95, 3.68]     | 0.068   | 1.91 [0.9, 4.02]                     | 0.090   |
| Asian                              | 111                       | 0.99 [0.66, 1.49]     | 0.98    | 1.15 [0.74, 1.78]                    | 0.55    | 126              | 0.62 [0.35, 1.1]      | 0.11    | 1.01 [0.55, 1.84]                    | 0.99    |
| Other/unknown                      | 414                       | 0.87 [0.67, 1.12]     | 0.28    | 1.43 [0.99, 2.07]                    | 0.059   | 441              | 0.9 [0.67, 1.21]      | 0.48    | 2.92 [1.88, 4.55]                    | <0.0001 |
| Diagnosis                          |                           |                       |         |                                      |         |                  |                       |         |                                      |         |
| CNS                                | 384                       | Ref                   |         |                                      |         | 442              | Ref                   |         |                                      |         |
| Non-CNS                            | 885                       | 0.65 [0.52, 0.81]     | <0.0001 |                                      |         | 994              | 0.59 [0.46, 0.78]     | 0.00013 |                                      |         |
| Underlying malignancy <sup>2</sup> |                           |                       |         |                                      |         |                  |                       |         |                                      |         |
| CNS                                | 384                       | Ref                   |         |                                      |         | 442              | Ref                   |         |                                      |         |
| Germ cell tumor                    | 193                       | 0.29 [0.17, 0.48]     | <0.0001 |                                      |         | 205              | 0.05 [0.01, 0.19]     | <0.0001 |                                      |         |
| Hepatic tumor (HB or HCC)          | 158                       | 0.39 [0.25, 0.62]     | <0.0001 |                                      |         | 170              | 0.27 [0.15, 0.51]     | <0.0001 |                                      |         |
| Neuroblastoma                      | 197                       | 0.93 [0.68, 1.26]     | 0.63    |                                      |         | 246              | 1.01 [0.72, 1.41]     | 0.95    |                                      |         |
| Osteosarcoma                       | 260                       | 0.81 [0.6, 1.09]      | 0.17    |                                      |         | 293              | 0.84 [0.6, 1.19]      | 0.33    |                                      |         |
| Other                              | 77                        | 0.83 [0.51, 1.34]     | 0.44    |                                      |         | 80               | 0.63 [0.34, 1.18]     | 0.15    |                                      |         |
| Stem cell transplant <sup>3</sup>  |                           |                       |         |                                      |         |                  |                       |         |                                      |         |
| No                                 | 1004                      | Ref                   |         | Ref                                  |         | 1015             | Ref                   |         | Ref                                  |         |
| Yes                                | 256                       | 2.16 [1.7, 2.74]      | <0.0001 | 1.27 [0.85, 1.89]                    | 0.25    | 258              | 1.86 [1.4, 2.48]      | <0.0001 | 0.68 [0.44, 1.05]                    | 0.084   |
| Unknown                            | 9                         |                       |         |                                      |         | 163              | 0.87 [0.4, 1.87]      | 0.72    | 2.39 [0.99, 5.73]                    | 0.051   |
| Carboplatin exposure <sup>3</sup>  |                           |                       |         |                                      |         |                  |                       |         |                                      |         |
| No                                 | 615                       | Ref                   |         | Ref                                  |         | 621              | Ref                   |         | Ref                                  |         |
| Yes                                | 200                       | 2.33 [1.71, 3.18]     | <0.0001 | 1.96 [1.31, 2.93]                    | 0.00099 | 209              | 1.89 [1.32, 2.71]     | 0.0005  | 1.42 [0.89, 2.26]                    | 0.15    |
| Unknown                            | 454                       | 2.63 [2.03, 3.42]     | <0.0001 | 1.4 [0.97, 2.01]                     | 0.069   | 606              | 1.96 [1.45, 2.66]     | <0.0001 | 0.66 [0.43, 1.02]                    | 0.062   |
| Vincristine exposure <sup>3</sup>  |                           |                       |         |                                      |         |                  |                       |         |                                      |         |
| No                                 | 563                       | Ref                   |         | Ref                                  |         | 661              | Ref                   |         | Ref                                  |         |
| Yes                                | 685                       | 1.72 [1.34, 2.19]     | <0.0001 | 1.43 [0.81, 2.52]                    | 0.22    | 754              | 1.98 [1.48, 2.66]     | <0.0001 | 1.07 [0.55, 2.1]                     | 0.84    |
| Unknown                            | 21                        | 6.19 [3.53, 10.86]    | <0.0001 | 3.96 [1.84, 8.52]                    | 0.00043 | 21               | 5.06 [2.43, 10.57]    | <0.0001 | 2.52 [0.97, 6.56]                    | 0.059   |
| CRT dose, Gy <sup>3</sup>          |                           |                       |         |                                      |         |                  |                       |         |                                      |         |
| 0                                  | 938                       | Ref                   |         | Ref                                  |         | 1067             | Ref                   |         | Ref                                  |         |
| >0 to ≤ 50                         | 53                        | 1.32 [0.79, 2.19]     | 0.29    | 1.61 [0.83, 3.1]                     | 0.16    | 55               | 1.25 [0.68, 2.30]     | 0.48    | 1.21 [0.55, 2.62]                    | 0.64    |

|                                                               |      |                   |         |                   |         |      |                   |         |                   |         |
|---------------------------------------------------------------|------|-------------------|---------|-------------------|---------|------|-------------------|---------|-------------------|---------|
| >50                                                           | 278  | 1.32 [1.03, 1.71] | 0.029   | 1.13 [0.71, 1.79] | 0.62    | 314  | 1.37 [1.02, 1.84] | 0.036   | 0.77 [0.45, 1.32] | 0.35    |
| VP Shunt                                                      |      |                   |         |                   |         |      |                   |         |                   |         |
| No                                                            | 643  | Ref               |         | Ref               |         | 646  | Ref               |         | Ref               |         |
| Yes                                                           | 117  | 1.56 [1.15, 2.11] | 0.0044  | 1.42 [0.97, 2.09] | 0.071   | 117  | 1.52 [1.07, 2.14] | 0.018   | 1.26 [0.83, 1.94] | 0.28    |
| Unknown                                                       | 509  | 0.33 [0.25, 0.44] | <0.0001 | 0.39 [0.27, 0.58] | <0.0001 | 673  | 0.19 [0.13, 0.28] | <0.0001 | 0.15 [0.09, 0.25] | <0.0001 |
| Cisplatin dosing parameters                                   |      |                   |         |                   |         |      |                   |         |                   |         |
| Cisplatin total cumulative dose, +100 mg/m <sup>2</sup>       | 1269 | 0.88 [0.81, 0.96] | 0.0043  | 0.92 [0.83, 1.02] | 0.11    | 1436 | 0.85 [0.77, 0.94] | 0.0020  | 0.85 [0.75, 0.97] | 0.018   |
| Cisplatin prescribed cycle dose, +50 mg/m <sup>2</sup> /cycle | 1269 | 1.32 [1.16, 1.5]  | <0.0001 | 1.78 [1.15, 2.75] | 0.0091  | 1436 | 1.40 [1.21, 1.62] | <0.0001 | 2.25 [1.35, 3.73] | 0.0017  |
| Cisplatin prescribed daily dose, +10 mg/m <sup>2</sup> /day   | 1269 | 1.02 [0.98, 1.06] | 0.32    | 0.94 [0.88, 1.01] | 0.11    | 1436 | 1.05 [0.99, 1.10] | 0.051   | 0.99 [0.91, 1.07] | 0.75    |
| Cisplatin dose rate, +1 mg/m <sup>2</sup> /hour               | 1269 | 1.01 [0.99, 1.01] | 0.11    | 0.99 [0.97, 1.01] | 0.13    | 1436 | 1.01 [0.99, 1.02] | 0.072   | 0.98 [0.96, 0.99] | 0.041   |

<sup>1</sup>Cisplatin dosing parameters were evaluated in a series of nested cox regression models including progressively more granular dosing (Model 2: +cumulative dose; Model 3: +cumulative dose, cycle dose; Model 4: +cumulative dose, cycle dose, daily dose; Model 5: +cumulative dose, cycle dose, daily dose, dose rate); Likelihood Ratio Tests compared each model for progression-free survival (Base Model vs. Model 2, p= 0.19; Models 2 vs. 3, p= 0.022; Models 3 vs. 4, p= 0.034; Models 4 vs. 5, p= 0.11) and overall survival (Base Model vs. Model 2, p= 0.026; Models 2 vs. 3, p= 0.0083; Models 3 vs. 4, p= 0.39; Models 4 vs. 5, p= 0.039). <sup>2</sup>Underlying malignancy was modeled as a strata factor in multivariable cox models. <sup>3</sup>Treatment variables included to additionally account for regimen differences potentially affecting survival within diagnosis strata. CNS = central nervous system tumor; HB or HCC = hepatoblastoma or hepatocellular carcinoma; CRT = cranial radiotherapy; VP shunt – ventriculoperitoneal (or other ventricular) shunt.

**Table S7: Multivariable models for moderate/severe hearing loss at end of therapy and progression-free and overall survival**

| Variables                          | Progression-free survival |                       |         |                                      |         | Overall survival |                       |         |                                      |         |
|------------------------------------|---------------------------|-----------------------|---------|--------------------------------------|---------|------------------|-----------------------|---------|--------------------------------------|---------|
|                                    | N                         | Univariable Cox model |         | Multivariable Cox model <sup>1</sup> |         | N                | Univariable Cox model |         | Multivariable Cox model <sup>1</sup> |         |
|                                    |                           | HR [95%CI]            | p-value | HR [95%CI]                           | p-value |                  | HR [95%CI]            | p-value | HR [95%CI]                           | p-value |
| Sex                                |                           |                       |         |                                      |         |                  |                       |         |                                      |         |
| Female                             | 483                       | Ref                   |         | Ref                                  |         | 547              | Ref                   |         | Ref                                  |         |
| Male                               | 665                       | 1.24 [0.98, 1.57]     | 0.079   | 1.12 [0.88, 1.44]                    | 0.36    | 727              | 1.32 [0.99, 1.74]     | 0.055   | 1.20 [0.90, 1.61]                    | 0.22    |
| Age at diagnosis, years            |                           |                       |         |                                      |         |                  |                       |         |                                      |         |
| <5                                 | 484                       | Ref                   |         | Ref                                  |         | 539              | Ref                   |         | Ref                                  |         |
| 5 to <15                           | 490                       | 1.07 [0.83, 1.37]     | 0.61    | 1.17 [0.84, 1.63]                    | 0.36    | 549              | 1.03 [0.77, 1.37]     | 0.85    | 1.03 [0.70, 1.52]                    | 0.89    |
| ≥15                                | 174                       | 1.21 [0.85, 1.72]     | 0.29    | 1.18 [0.74, 1.88]                    | 0.49    | 186              | 1.08 [0.70, 1.66]     | 0.74    | 0.84 [0.48, 1.48]                    | 0.55    |
| Ethnicity                          |                           |                       |         |                                      |         |                  |                       |         |                                      |         |
| Non-Hispanic                       | 665                       | Ref                   |         | Ref                                  |         | 781              | Ref                   |         | Ref                                  |         |
| Hispanic                           | 324                       | 1.24 [0.96, 1.61]     | 0.096   | 0.83 [0.58, 1.20]                    | 0.33    | 327              | 1.32 [0.98, 1.77]     | 0.068   | 0.78 [0.51, 1.19]                    | 0.25    |
| Unknown                            | 159                       | 0.43 [0.27, 0.68]     | 0.00041 | 0.65 [0.35, 1.22]                    | 0.18    | 166              | 0.18 [0.08, 0.40]     | <0.0001 | 0.27 [0.10, 0.73]                    | 0.0096  |
| Race                               |                           |                       |         |                                      |         |                  |                       |         |                                      |         |
| White                              | 633                       | Ref                   |         | Ref                                  |         | 720              | Ref                   |         | Ref                                  |         |
| Black                              | 25                        | 1.65 [0.84, 3.22]     | 0.14    | 1.24 [0.60, 2.57]                    | 0.56    | 28               | 1.93 [0.94, 3.94]     | 0.072   | 1.66 [0.75, 3.69]                    | 0.22    |
| Asian                              | 102                       | 0.99 [0.65, 1.49]     | 0.95    | 1.10 [0.70, 1.75]                    | 0.67    | 115              | 0.62 [0.35, 1.10]     | 0.10    | 1.03 [0.56, 1.91]                    | 0.92    |
| Other/unknown                      | 388                       | 0.82 [0.63, 1.07]     | 0.14    | 1.51 [1.02, 2.23]                    | 0.039   | 411              | 0.80 [0.59, 1.10]     | 0.17    | 2.93 [1.84, 4.65]                    | <0.0001 |
| Diagnosis                          |                           |                       |         |                                      |         |                  |                       |         |                                      |         |
| CNS                                | 334                       | Ref                   |         |                                      |         | 378              | Ref                   |         |                                      |         |
| Non-CNS                            | 814                       | 0.61 [0.48, 0.78]     | <0.0001 |                                      |         | 896              | 0.59 [0.45, 0.77]     | 0.00014 |                                      |         |
| Underlying malignancy <sup>2</sup> |                           |                       |         |                                      |         |                  |                       |         |                                      |         |
| CNS                                | 334                       | Ref                   |         |                                      |         | 378              | Ref                   |         |                                      |         |
| Germ cell tumor                    | 178                       | 0.29 [0.18, 0.49]     | <0.0001 |                                      |         | 185              | 0.05 [0.01, 0.19]     | <0.0001 |                                      |         |
| Hepatic tumor (HB or HCC)          | 142                       | 0.33 [0.20, 0.54]     | <0.0001 |                                      |         | 150              | 0.26 [0.14, 0.51]     | <0.0001 |                                      |         |
| Neuroblastoma                      | 191                       | 0.87 [0.63, 1.19]     | 0.38    |                                      |         | 227              | 0.96 [0.68, 1.35]     | 0.79    |                                      |         |
| Osteosarcoma                       | 240                       | 0.75 [0.55, 1.03]     | 0.073   |                                      |         | 270              | 0.85 [0.60, 1.21]     | 0.37    |                                      |         |
| Other                              | 63                        | 0.84 [0.51, 1.40]     | 0.51    |                                      |         | 64               | 0.58 [0.29, 1.15]     | 0.12    |                                      |         |
| Stem cell transplant <sup>3</sup>  |                           |                       |         |                                      |         |                  |                       |         |                                      |         |
| No                                 | 894                       | Ref                   |         | Ref                                  |         | 901              | Ref                   |         | Ref                                  |         |
| Yes                                | 245                       | 2.05 [1.61, 2.62]     | <0.0001 | 1.01 [0.67, 1.51]                    | 0.98    | 246              | 1.70 [1.27, 2.28]     | 0.00040 | 0.50 [0.32, 0.78]                    | 0.0021  |
| Unknown                            | 9                         |                       |         |                                      |         | 127              | 0.54 [0.20, 1.46]     | 0.22    | 1.26 [0.42, 3.74]                    | 0.68    |
| Carboplatin exposure <sup>3</sup>  |                           |                       |         |                                      |         |                  |                       |         |                                      |         |
| No                                 | 575                       | Ref                   |         | Ref                                  |         | 580              | Ref                   |         | Ref                                  |         |
| Yes                                | 189                       | 2.39 [1.74, 3.27]     | <0.0001 | 2.26 [1.50, 3.41]                    | 0.00011 | 194              | 2.01 [1.40, 2.89]     | 0.00016 | 1.83 [1.13, 2.96]                    | 0.013   |
| Unknown                            | 384                       | 2.89 [2.21, 3.79]     | <0.0001 | 1.57 [1.07, 2.30]                    | 0.021   | 500              | 2.19 [1.60, 3.00]     | <0.0001 | 0.77 [0.48, 1.21]                    | 0.25    |
| Vincristine exposure <sup>3</sup>  |                           |                       |         |                                      |         |                  |                       |         |                                      |         |
| No                                 | 515                       | Ref                   |         | Ref                                  |         | 589              | Ref                   |         | Ref                                  |         |
| Yes                                | 614                       | 1.75 [1.36, 2.25]     | <0.0001 | 1.41 [0.76, 2.59]                    | 0.28    | 666              | 2.03 [1.50, 2.75]     | <0.0001 | 1.15 [0.52, 2.52]                    | 0.73    |
| Unknown                            | 19                        | 7.47 [4.24, 13.15]    | <0.0001 | 4.18 [1.89, 9.27]                    | 0.00042 | 19               | 6.02 [2.87, 12.6]     | <0.0001 | 3.21 [1.14, 9.00]                    | 0.027   |
| CRT dose, Gy <sup>3</sup>          |                           |                       |         |                                      |         |                  |                       |         |                                      |         |
| 0                                  | 866                       | Ref                   |         | Ref                                  |         | 961              | Ref                   |         | Ref                                  |         |
| >0 to ≤50                          | 51                        | 1.23 [0.73, 2.09]     | 0.43    | 1.46 [0.73, 2.94]                    | 0.28    | 53               | 1.11 [0.58, 2.11]     | 0.75    | 1.24 [0.54, 2.85]                    | 0.61    |

|                                                               |       |                   |         |                   |         |       |                   |         |                   |         |
|---------------------------------------------------------------|-------|-------------------|---------|-------------------|---------|-------|-------------------|---------|-------------------|---------|
| >50                                                           | 231   | 1.43 [1.10, 1.86] | 0.0074  | 1.15 [0.71, 1.87] | 0.57    | 260   | 1.48 [1.09, 2.00] | 0.011   | 0.96 [0.54, 1.71] | 0.88    |
| VP shunt                                                      |       |                   |         |                   |         |       |                   |         |                   |         |
| No                                                            | 565   | Ref               |         | Ref               |         | 567   | Ref               |         | Ref               |         |
| Yes                                                           | 102   | 1.65 [1.21, 2.25] | 0.0017  | 1.50 [0.99, 2.25] | 0.052   | 102   | 1.53 [1.08, 2.17] | 0.017   | 1.37 [0.87, 2.15] | 0.17    |
| Unknown                                                       | 481   | 0.30 [0.23, 0.41] | <0.0001 | 0.38 [0.26, 0.57] | <0.0001 | 605   | 0.14 [0.09, 0.22] | <0.0001 | 0.14 [0.08, 0.24] | <0.0001 |
| Cisplatin dosing parameters                                   |       |                   |         |                   |         |       |                   |         |                   |         |
| Cisplatin total cumulative dose, +100 mg/m <sup>2</sup>       | 1,148 | 0.88 [0.81, 0.97] | 0.0063  | 0.93 [0.84, 1.04] | 0.20    | 1,274 | 0.88 [0.79, 0.97] | 0.015   | 0.89 [0.78, 1.02] | 0.11    |
| Cisplatin prescribed cycle dose, +50 mg/m <sup>2</sup> /cycle | 1,148 | 1.29 [1.13, 1.48] | 0.00012 | 1.85 [1.19, 2.89] | 0.0065  | 1,274 | 1.38 [1.19, 1.61] | <0.001  | 2.60 [1.49, 4.56] | 0.00082 |
| Cisplatin prescribed daily dose, +10 mg/m <sup>2</sup> /day   | 1,148 | 1.02 [0.98, 1.06] | 0.44    | 0.95 [0.88, 1.02] | 0.13    | 1,274 | 1.05 [1.00, 1.10] | 0.052   | 1.00 [0.92, 1.09] | 0.96    |
| Cisplatin dose rate, +1 mg/m <sup>2</sup> /hour               | 1,148 | 1.01 [0.99, 1.01] | 0.18    | 0.98 [0.97, 1.01] | 0.10    | 1,274 | 1.01 [0.99, 1.02] | 0.13    | 0.98 [0.96, 0.99] | 0.033   |
| Hearing loss at end of therapy                                |       |                   |         |                   |         |       |                   |         |                   |         |
| No                                                            | 701   | Ref               |         | Ref               |         | 779   | Ref               |         | Ref               |         |
| Yes                                                           | 447   | 1.00 [0.79, 1.26] | 0.99    | 0.93 [0.71, 1.22] | 0.60    | 495   | 1.01 [0.77, 1.33] | 0.96    | 0.85 [0.62, 1.16] | 0.30    |

<sup>1</sup>Cisplatin dosing parameters were evaluated in a series of nested cox regression models including progressively more granular dosing (Model 2: +cumulative dose; Model 3: +cumulative dose, cycle dose; Model 4: +cumulative dose, cycle dose, daily dose; Model 5: +cumulative dose, cycle dose, daily dose, dose rate; Model 6: cumulative dose, cycle dose, daily dose, dose rate, hearing loss at end of therapy); Likelihood Ratio Tests compared each model for progression-free survival (Base Model vs. Model 2, p= 0.27; Models 2 vs. 3, p= 0.020; Models 3 vs. 4, p= 0.035; Models 4 vs. 5, p= 0.091; Models 5 vs. 6, p= 0.60) and overall survival (Base Model vs. Model 2, p= 0.11; Models 2 vs. 3, p= 0.0045; Models 3 vs. 4, p= 0.51; Models 4 vs. 5, p= 0.031; Models 5 vs. 6, p= 0.30). <sup>2</sup>Underlying malignancy was modeled as a strata factor in multivariable cox models. <sup>3</sup>Treatment variables included to additionally account for regimen differences potentially affecting survival within diagnosis strata. CNS = central nervous system tumor; HB or HCC = hepatoblastoma or hepatocellular carcinoma; CRT = cranial radiotherapy; VP shunt – ventriculoperitoneal (or other ventricular) shunt.
